# Supplementary material for: Global Population Structure of the Genes Encoding the Malaria Vaccine Candidate, Plasmodium vivax Apical Membrane Antigen 1 (PvAMA1)
Source: PLOS journal article supplement (doi:10.1371/journal.pntd.0002506), 2013-10-31

## Reference strains

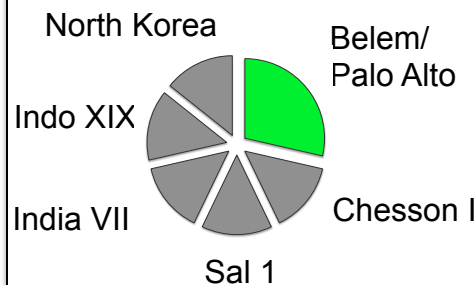

**India**  
Rajasthan  
(n=8)

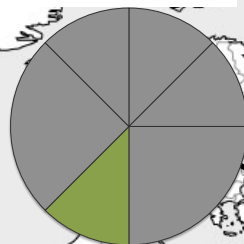

**South Korea**  
(n=1)

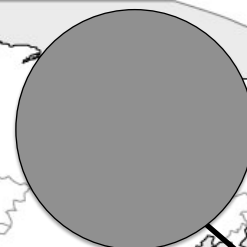

**Papua New  
Guinea**

Madang  
(n=61)

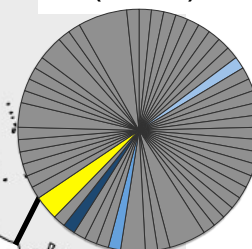

**Venezuela**

Amazon Basin 1996  
(n=28)

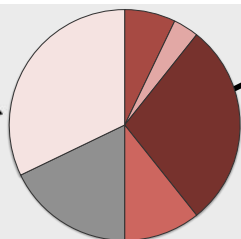

**Sri Lanka**  
Kataragama-Colombo  
(n=23)

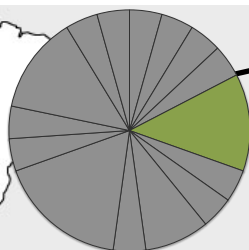

**Thailand**

Tak 1996  
(n=58)

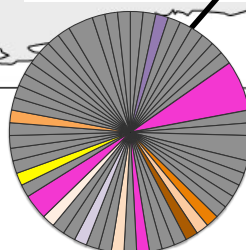

Tak 2007  
(n=44)

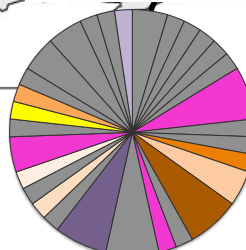

Chanthaburi  
(n=56)

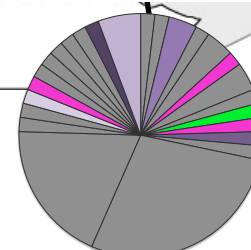

East Sepik  
(n=41)

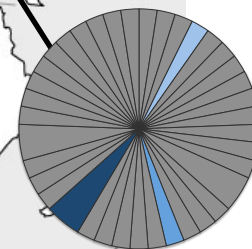

Amazon Basin 1997  
(n=45)

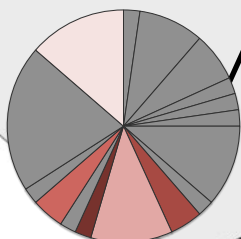

Supplement: S4 (10.1371/journal.pntd.0002506.s004) [file journal.pntd.0002506.s004]
